# Supplementary material
Source: publisher figshare collection journal article supplement (https://asha.figshare.com/ndownloader/files/36131693)
Supplement: Supplementary file 1 [file 36131693]

**Supplemental Material S1.** Summary of the number of participants excluded in each step of the exclusion criteria and the distribution of excluded participants from each school district.

|                                                   | <b>Total</b> | <b>By school district</b> |                    | <b>Remaining <i>N</i><br/>in the sample</b> |
|---------------------------------------------------|--------------|---------------------------|--------------------|---------------------------------------------|
|                                                   |              | <b>Houston</b>            | <b>Brownsville</b> |                                             |
| Original participants                             | 1532         | 520                       | 1012               | 1532                                        |
| Missing transcript in one or both languages       | 595          | 236                       | 359                | 937                                         |
| Fewer than 5 complete and intelligible utterances | 5            | 0                         | 5                  | 932                                         |
| Less than 75% NDW in the target language          | 30           | 9                         | 21                 | 902                                         |
| Data collection procedure error                   | 37           | 6                         | 31                 | 865                                         |
| Multivariate outlier                              | 18           | 5                         | 13                 | 847                                         |
